# Supplementary material for: HMGA2 promotes vasculogenic mimicry and tumor aggressiveness by upregulating Twist1 in gastric carcinoma
Source: PubMed Central journal article supplement (PMC5440402; doi:10.1038/s41598-017-02494-6), 2017-05-22

**HMGA2 promotes vasculogenic mimicry and tumor aggressiveness  
by upregulating Twist1 in gastric carcinoma**

Junying Sun<sup>1,#</sup>, Baocun Sun<sup>1,2,3,#\*</sup>, Ran Sun<sup>4</sup>, Dongwang Zhu<sup>5</sup>, Xiulan Zhao<sup>1,2</sup>, Yanhui Zhang<sup>3</sup>, Xueyi Dong<sup>1</sup>, Na Che<sup>1,2</sup>, Jing Li<sup>1,2</sup>, Fang Liu<sup>1</sup>, Nan Zhao<sup>1,2</sup>, Yong Wang<sup>3</sup>, Danfang Zhang<sup>1,2</sup>

<sup>1</sup> Department of Pathology, Tianjin Medical University, Tianjin 300070, China

<sup>2</sup> Department of Pathology, Tianjin General Hospital, Tianjin Medical University, Tianjin 300052, China

<sup>3</sup> Department of Pathology, Tianjin Cancer Hospital, Tianjin Medical University, Tianjin 300060, China

<sup>4</sup> Department of Surgery, Tianjin Nankai Hospital, Tianjin 300100, China

<sup>5</sup> Department of Prosthodontics, Affiliated Stomatological Hospital, Tianjin Medical University, Tianjin 300070, China

#These authors equally contribute to this study.

**\*Corresponding author:**

Prof. Baocun Sun,

Department of Pathology and General Hospital and Cancer Hospital of Tianjin Medical University, Tianjin 300070, PR China;

E-mail: baocunsun@aliyun.com

Tel: 86-13602111192

Fax: 86-22-83336813

Mailing Address : No.22 Qixiangtai Road, Heping District, Tianjin  
300070, China

**Table S1. Antibodies used in this study**

| Antibody    | Source | IHC Concentration/<br>WB | Product<br>Number | Manufacture             |
|-------------|--------|--------------------------|-------------------|-------------------------|
| HMGA2       | Rabbit | 1:100 (IHC)<br>1:500(WB) | Ab-52039          | Abcam                   |
| Twist1      | Rabbit | 1:200 (IHC)<br>1:200(WB) | Sc-15393          | Santa Cruz              |
| VE-cadherin | Rabbit | 1:500(WB)<br>1:400(IHC)  | ab33168           | Abcam                   |
| E-cadherin  | Mouse  | 1:200(WB)<br>1:100(IHC)  | ab1416            | Abcam                   |
| N-cadherin  | Rabbit | 1:1000(WB)               | AF4039            | Affinity<br>Biosciences |
| Vimentin    | Rabbit | 1:500(WB)<br>1:200(IHC)  | ab92547           | Abcam                   |
| MMP2        | Rabbit | 1:200(WB)<br>1:100(IHC)  | 10373-2-AP        | LuoSai-BIO              |
| MMP9        | Rabbit | 1:500(WB)                | ab76003           | Abcam                   |
| GAPDH       | Rabbit | 1:2000(WB)               | Sc-25778          | Santa Cruz              |
| CD34        | Mouse  | 1:550(IHC)               | Zm-0046           | ZSGB-Bio                |
| Endomucin   | Rat    | 1:800(IHC)               | 14-5851-81        | Ebioscience             |

Note: IHC: Immunohistochemistry, WB: Western blot.

**Table S2. The sequences of primer used for Semi-quantitative RT-PCR**

| Gene   | Forward primer(5'-3')     | Reverse primer(5'-3')   |
|--------|---------------------------|-------------------------|
| Twist1 | CCATCCACACCGTCCCCTCCCCCTC | TCTGGCTCTTCCTCGCTGTTGCT |
| CDH5   | ACAAGGACATAACACCACGAAACG  | TGAGATGACCACGGGTAGGAAGT |
| HMGA2  | CCCAAAGGCAGCAAAAACA A     | GCCTCTTGGCCGTTTTTCTC    |
| GAPDH  | CCTGGCCAAGGTCATCCATGAC    | TGTCATACCAGGAAATGAGCTTG |

**Table S3. The sequences of primer used for ChIP-q PCR**

| Primer name | Forward primer (5'-3')   | Reverse primer (5'-3') |
|-------------|--------------------------|------------------------|
| Primer1     | CCCACTGTGTAGAAGCTGTTG    | GAAGCGGTCGGAGGAGA      |
| Primer2     | GTCACAATGCGGAGCCTAAT     | AAACCCAGTCCATGGGAAAG   |
| Primer3     | GGTTAATGGGCAGCTAAGACA    | CCTGTAGAAAGTGCAGGATCAG |
| Primer4     | CTCATGATGTCAGGCGGTTT     | ACGGAGTTCTGTTTGGGTTTC  |
| Primer5     | GCGGTGCCAAGTGTCAG        | GTCTCCGGAAATTCGAGGTTG  |
| Primer6     | GAAGGTGTGTAATTGGAGTTAAGG | CTCCTCTGTGCCAGTGATT    |

**Fig.S1 The expression of HMGA2 in GC cell lines and its relation of Twist1, VE-cadherin in GC patients.**

(A)Western blot showed the expression of HMGA2 expression in various GC cell lines (\*p < 0.05) (B) Immunofluorescence staining showed the expression of HMGA2 in cells which formed VM on matrigel.(C)The relation of HGMA2 and Twist1, VE-cadherin in GC patients and they are significantly related to poor prognosis (\*P<0.05)

Fig.S1

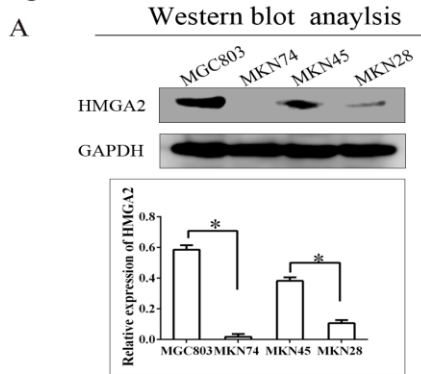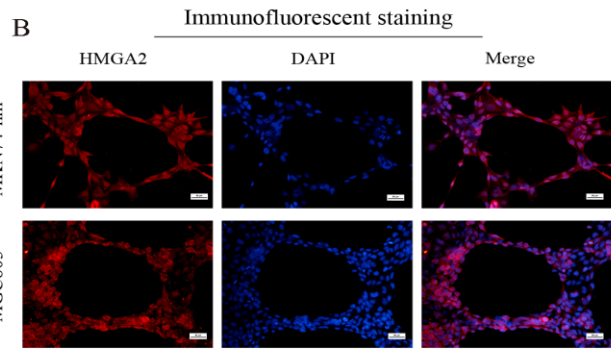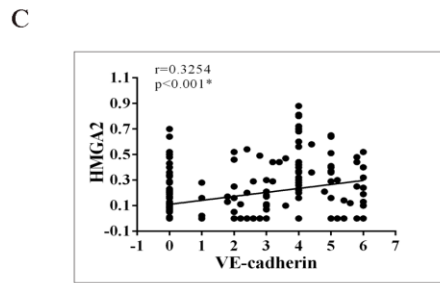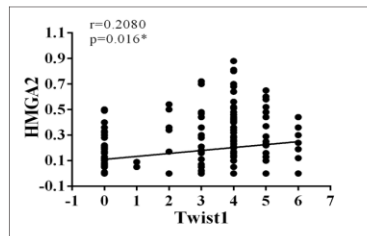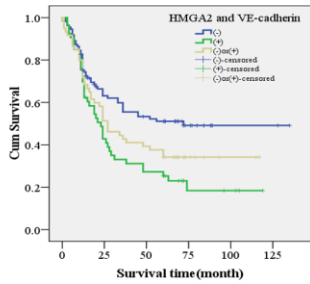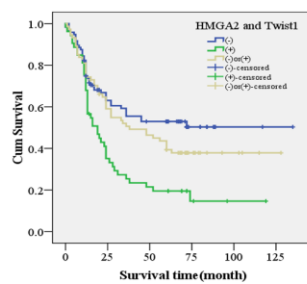

Fig.S2

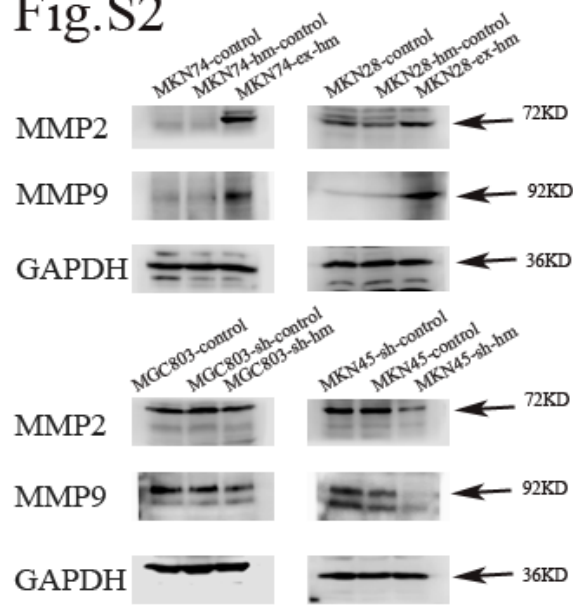

Fig.S3

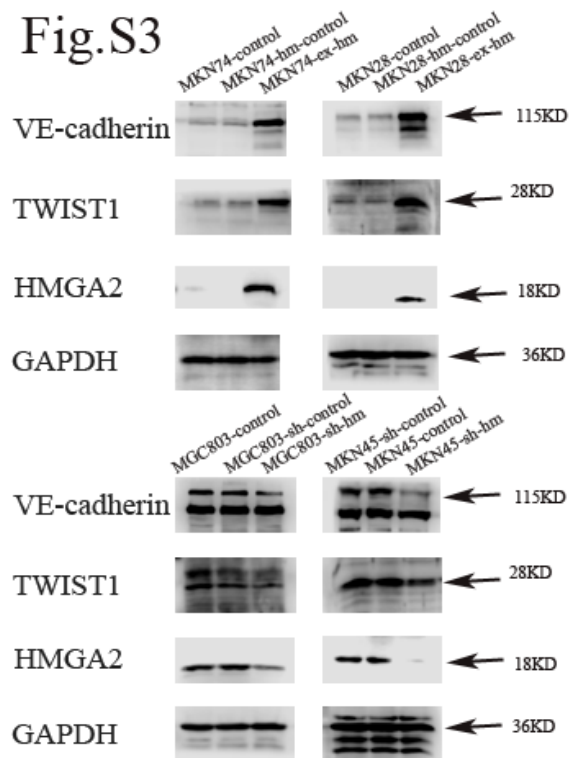

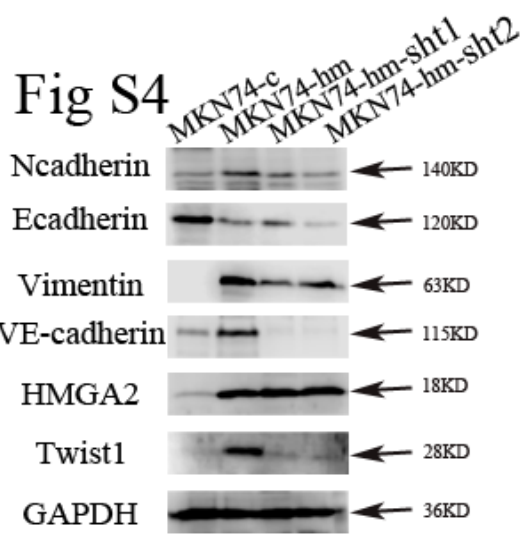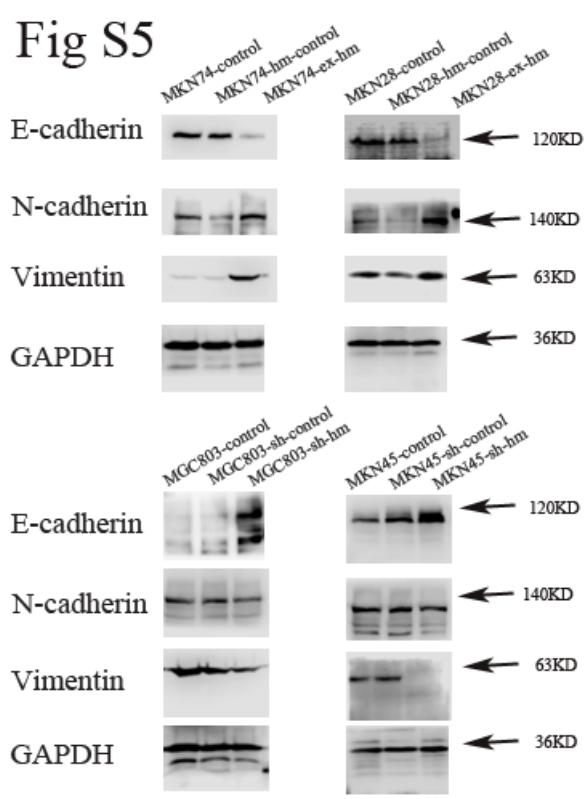

Supplement: 41598_2017_2494_MOESM1_ESM.pdf [file 41598_2017_2494_MOESM1_ESM.pdf]
